# Supplementary material
Source: Research Square preprint supplement (doi:10.21203/rs.3.rs-8950557/v1)
Supplement: Supplementary file 1 [file 4df200708d36dbe772cf789b.docx]

# Supplementary File

CARE Checklist (2013 Guidelines)

Journal: Egyptian Pediatric Association Gazette

Manuscript Title: Giant Subcortical Heterotopia Mimicking a Brain Tumor: A Case Report

Manuscript ID: ____________________

The authors confirm that the manuscript has been prepared in accordance with the CARE (CAse REport) guidelines. Page and line numbers correspond to the submitted version of the manuscript.

| CARE Item | Description | Location (Page and Line Number) |
| --- | --- | --- |
| Title | Diagnosis followed by 'case report' | Page 1, Line 1 |
| Key Words | 2–5 key words including 'case report' | Page 1, Line 3 |
| Abstract | Background, case presentation, and conclusions | Page 1, Lines 4–18 |
| Introduction | Brief background and rationale | Page 2, Lines 1–6 |
| Patient Information | Demographics and relevant history | Page 2, Lines 8–10 |
| Clinical Findings | Physical examination findings | Page 2, Lines 10–12 |
| Timeline | Chronological summary of events | Page 2, Lines 8–18 |
| Diagnostic Assessment | Imaging and diagnostic reasoning | Page 2, Lines 12–18; Pages 3–4 (Figures 1–2) |
| Therapeutic Intervention | Medical treatment initiated | Page 2, Line 15 |
| Follow-up and Outcomes | Clinical and imaging follow-up | Page 2, Lines 15–18 |
| Discussion | Interpretation and literature comparison | Pages 4–6 |
| Patient Perspective | Family perspective | Page 2, Line 18 |
| Informed Consent | Consent for publication statement | Page 7 (Consent for publication section) |

Signed on behalf of all authors:

______________________________
Corresponding Author Dr Karimi Jihad
Date: 24/02/2026
